# Supplementary material for: Identification of c.1531C>T Pathogenic Variant in the CDH1 Gene as a Novel Germline Mutation of Hereditary Diffuse Gastric Cancer
Source: MDPI journal article supplement (doi:10.3390/ijms20204980), 2019-10-09
Supplement: s1 [file s1]

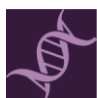

## Supplementary Materials: Identification of the non-synonymous c.1531C>T pathogenic variant in the *CDH1* gene as a novel germline mutation of hereditary diffuse gastric cancer

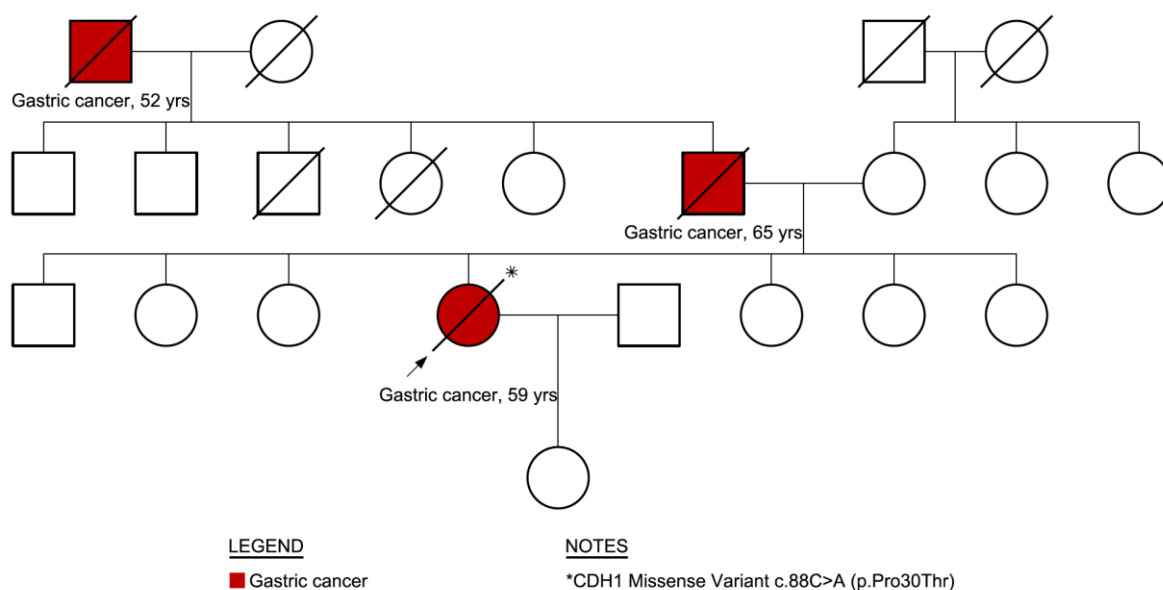

**Figure S1.** Family pedigree of proband with c88C>A (p.Pro30Thr, rs139866691) variant in a family history of HDGC. In red, the proband and two individuals in which DGC was confirmed.

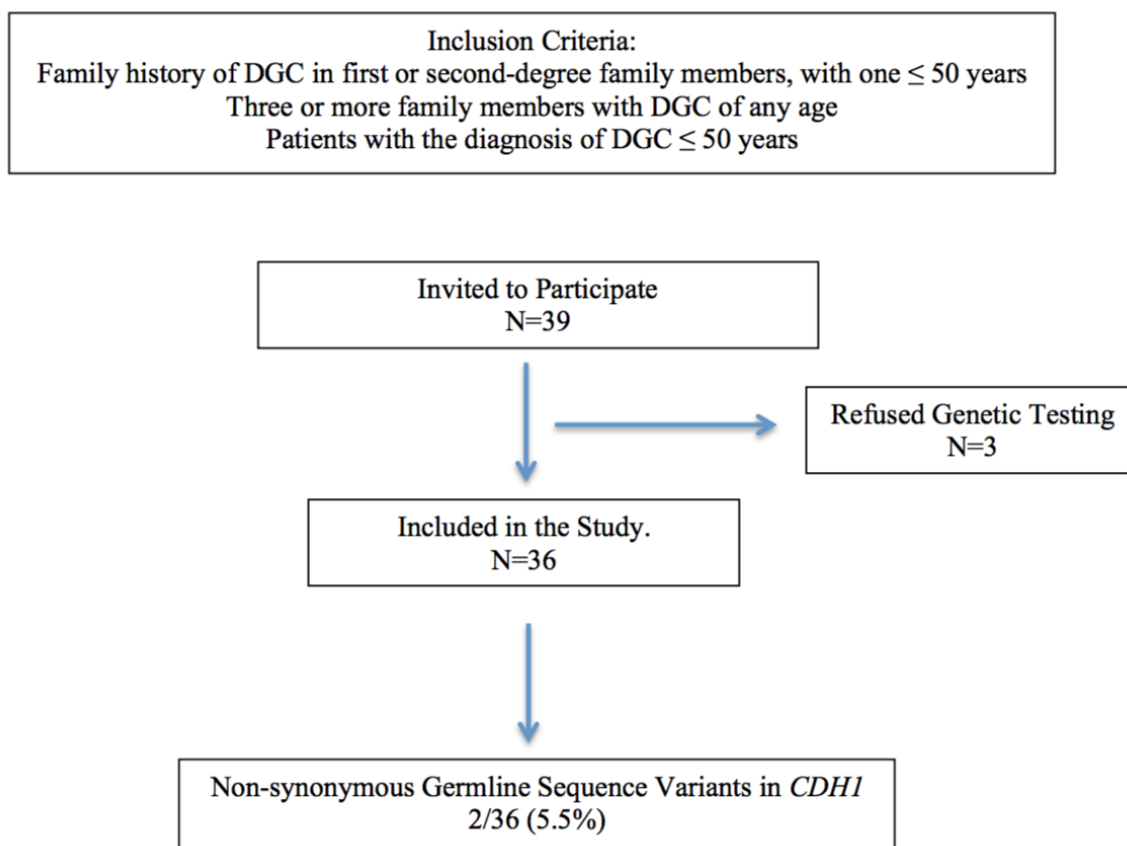

**Figure S2:** Flowchart of the study. DGC: Diffuse gastric cancer.
